# Supplementary material for: Prediction of osteoporosis from simple hip radiography using deep learning algorithm
Source: PubMed Central journal article supplement (PMC8497544; doi:10.1038/s41598-021-99549-6), 2021-10-07

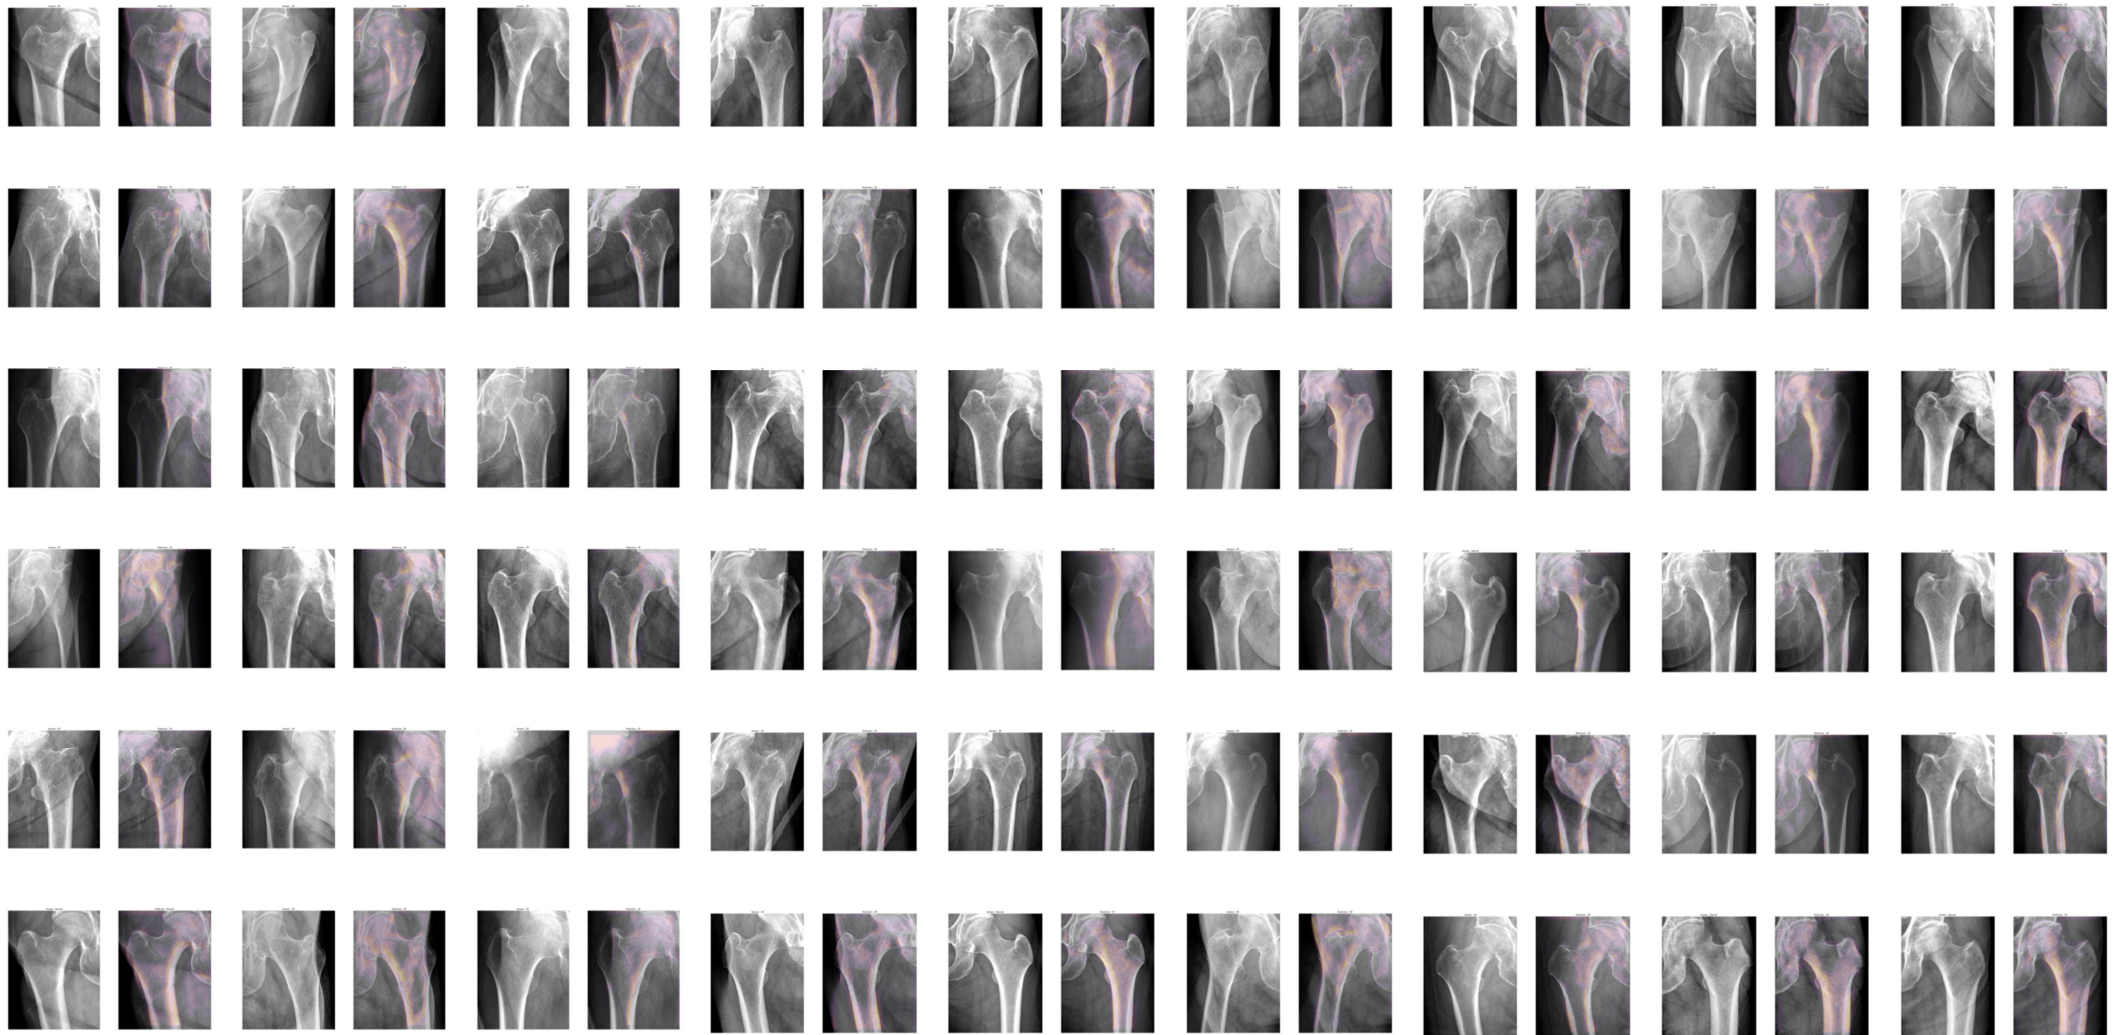

Supplementary File S2. Grad-CAM results of all 117 external validation sets

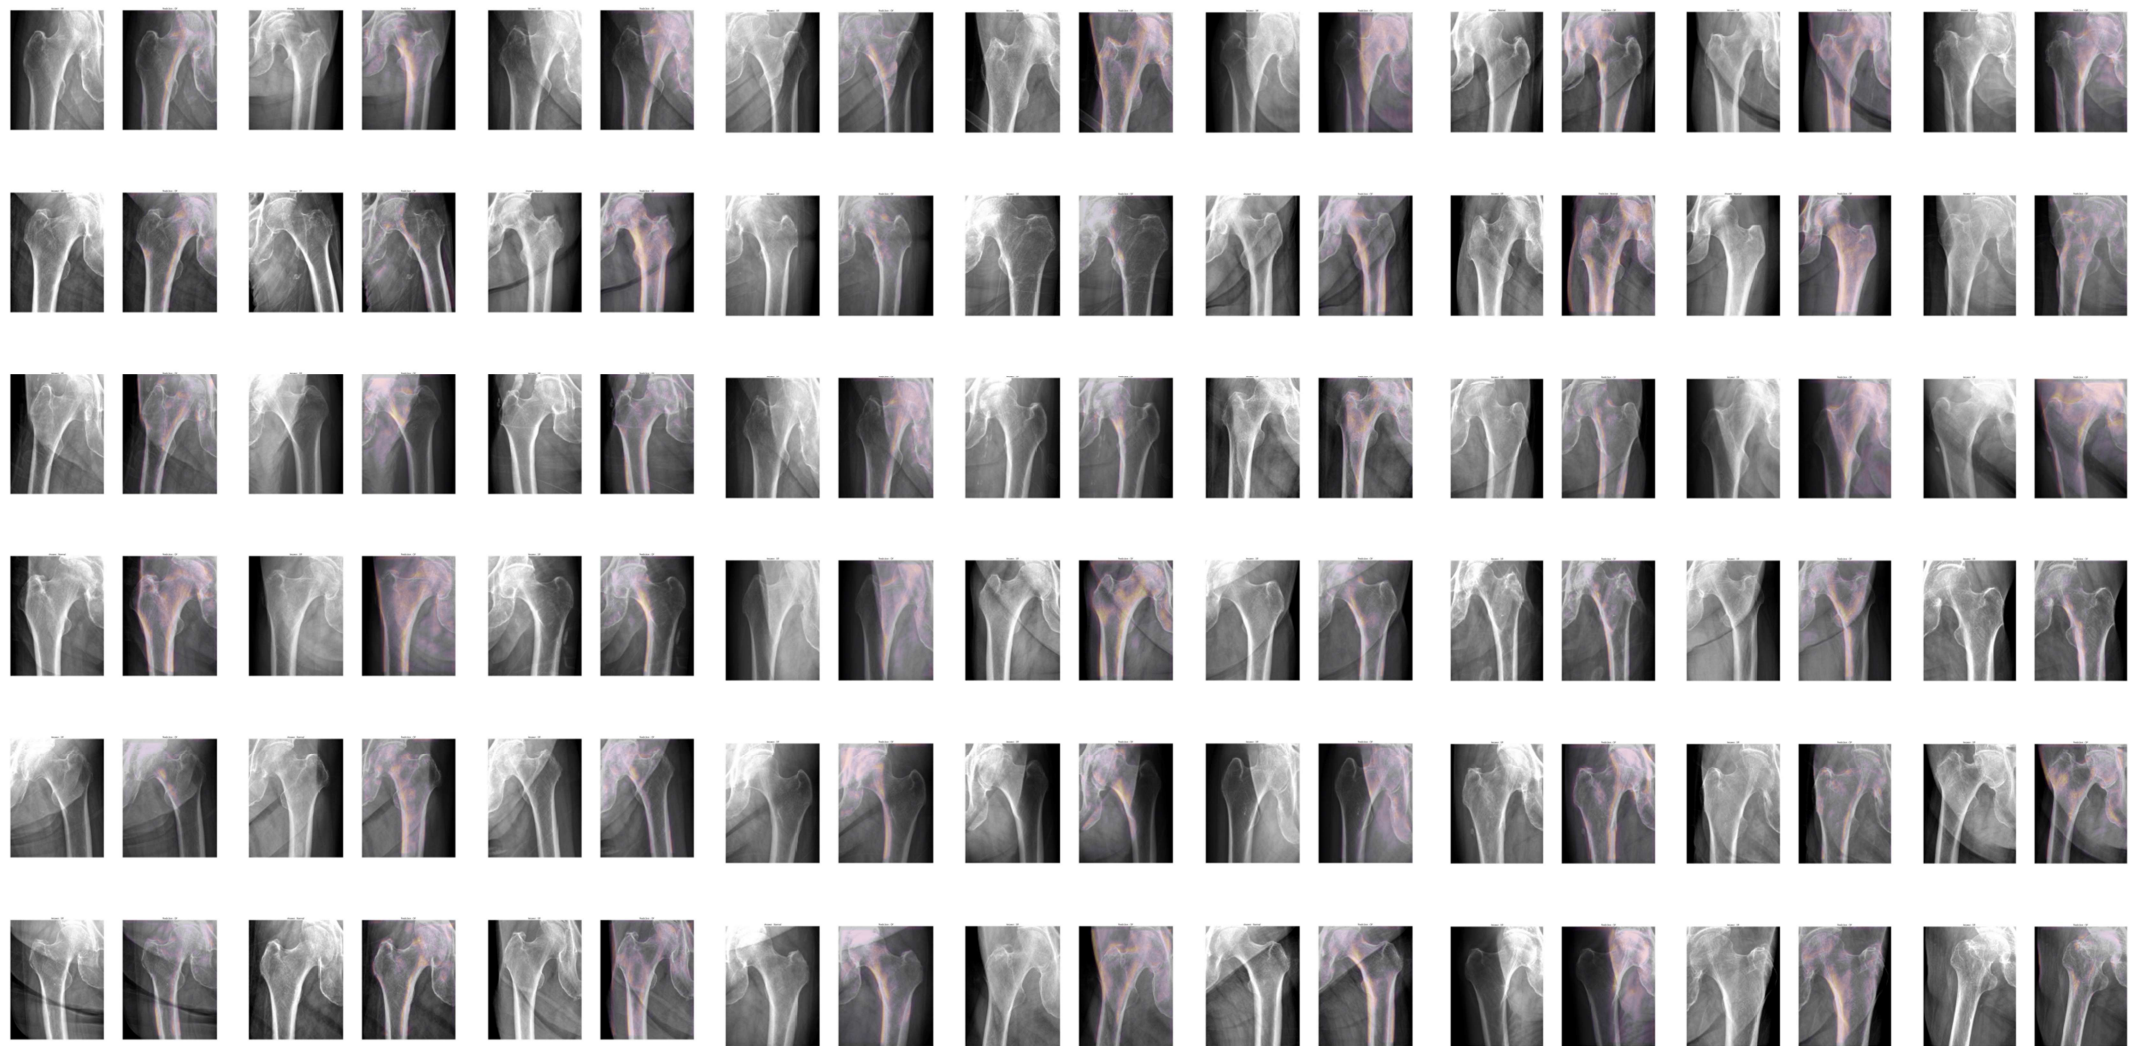

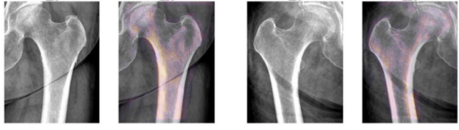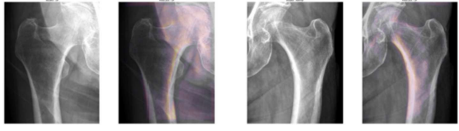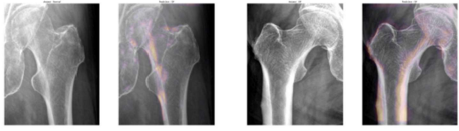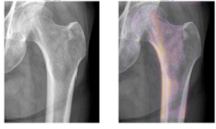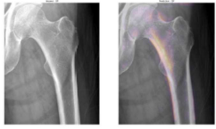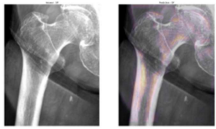

Supplement: 41598_2021_99549_MOESM2_ESM.pdf [file 41598_2021_99549_MOESM2_ESM.pdf]
